# Supplementary material
Source: PubMed Central journal article supplement (PMC7153492)

# Supplementary Material

## MK0677, a Ghrelin Mimetic Improves Neurogenesis but Fails to Prevent Hippocampal Lesions in a Mouse Model of Alzheimer's Disease Pathology

**Supplementary Figure 1. Dentate gyrus synaptic density remained unaltered in 5xFAD regardless of MK0677 treatment.** A) Saline and MK0677-treated 5xFAD mice showed similar synaptic density in hippocampal dentate gyrus area. Two-way ANOVA followed by Bonferroni post hoc analysis.  $t = 4.718$ ,  $**p < 0.01$  between nonTg saline and 5xFAD saline groups;  $t = 0.6174$ , NS, no significant difference for 5xFAD saline and MK0677 treatment groups;  $t = 0.6976$ , NS, no significant difference for nonTg saline and MK0677 treatment groups.  $n = 4$  mice per group except for 5xFAD MK0677 treatment ( $n = 3$ ). B) Representative images of synapse staining. vGlut1 (blue) and PSD95 (red) were used as pre- and post-synaptic markers, respectively. The overlaid staining of vGlut1 and PSD95 indicates synapses. Scale bar = 20  $\mu\text{m}$ .

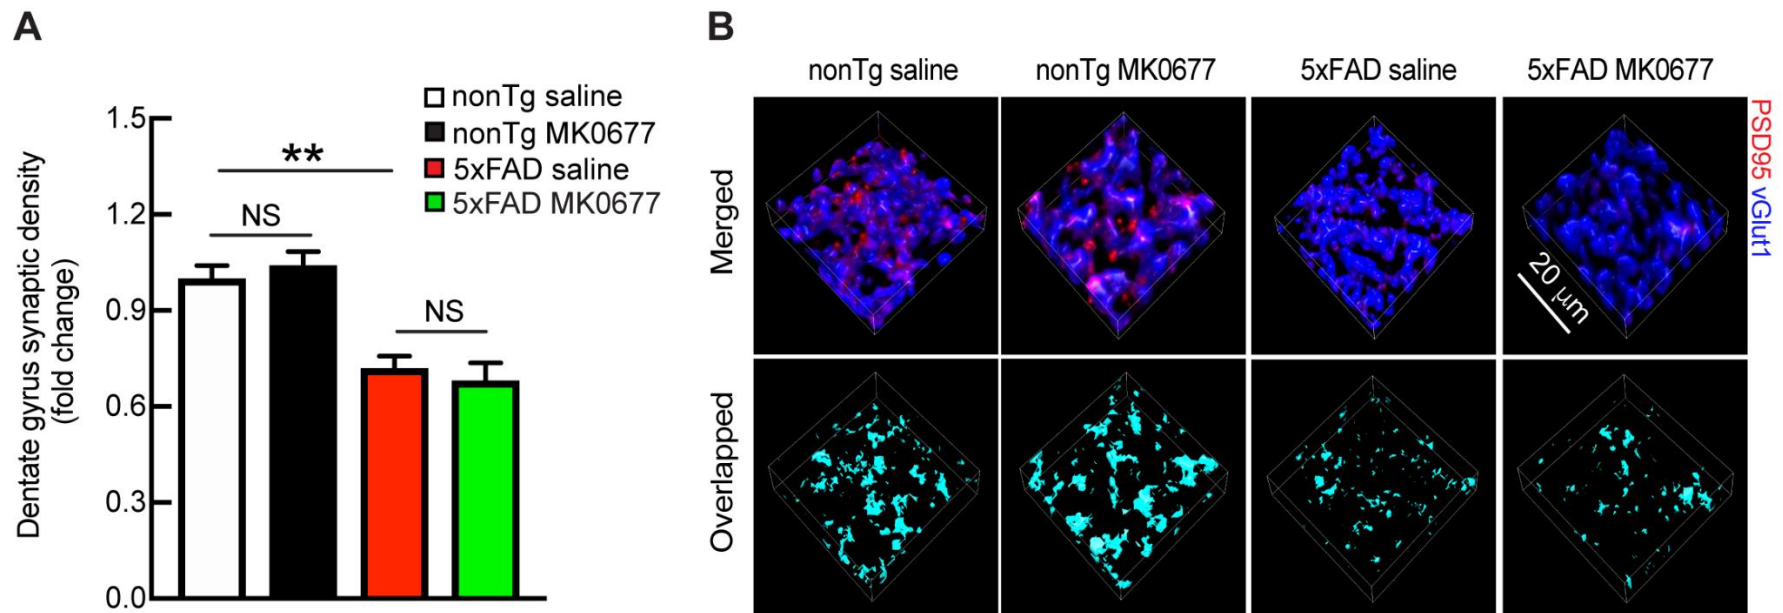

**Supplementary Figure 2. MK0677 treatment did not influence cortical amyloid plaque deposition.** A) MK0677 treatment did not change amyloid plaque-occupied volume on 5xFAD mice. Unpaired Student's *t*-test.  $t = 1.059$ , NS, not significant,  $n = 4$  mice per group. B) Cortical single amyloid plaque volume remained the same in 5xFAD mice with MK0677 treatment. Unpaired Student's *t*-test.  $t = 1.982$ , NS, not significant,  $n = 4$  mice per group. C) Representative images for amyloid plaque staining. Scale bar = 200  $\mu\text{m}$ .

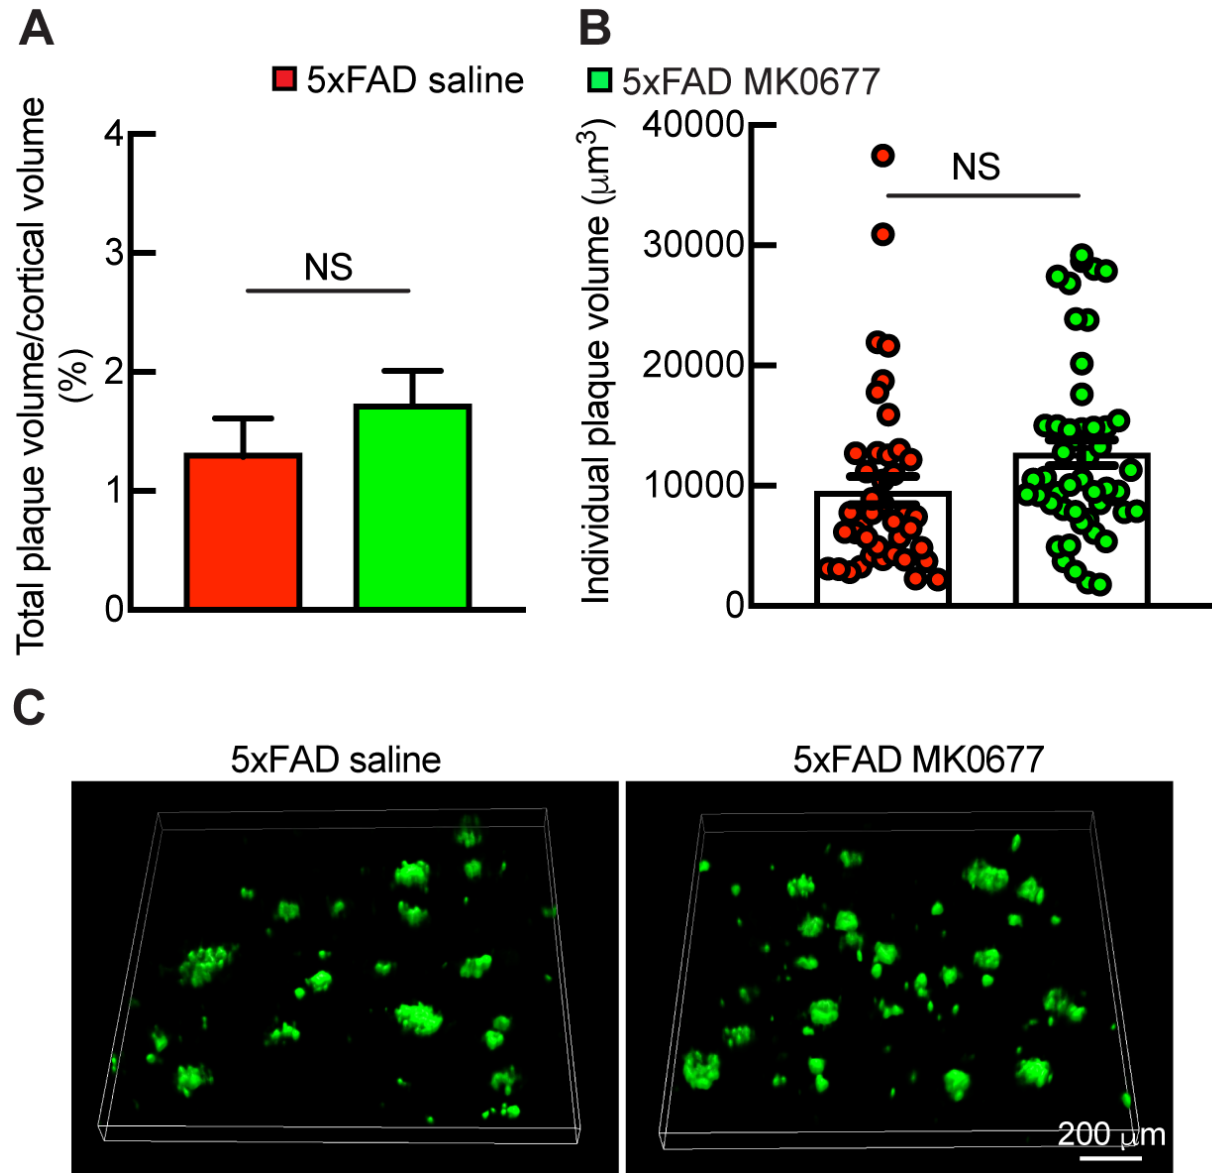

**Supplementary Figure 3. MK0677 did not cause microglia related changes in 5xFAD mice cortex.** A1) Microglia density remained the same in 5xFAD mice cortex after MK0677 treatment. Unpaired Student's *t*-test.  $t = 1.704$ , NS, not significant,  $n = 4$  mice per group. A2) 3D representative images for hippocampal microglia density. Iba1 (red) were used to stain microglia. Scale bar = 10  $\mu\text{m}$ . B1) Cortical plaque-associated microglia density remained unchanged after MK0677 treatment in 5xFAD mice. Unpaired Student's *t*-test.  $t = 0.7636$ , NS, not significant,  $n = 4$  mice per group. B2) 3D representative images for cortical plaque-associated microglia density. Scale bar = 20  $\mu\text{m}$ .

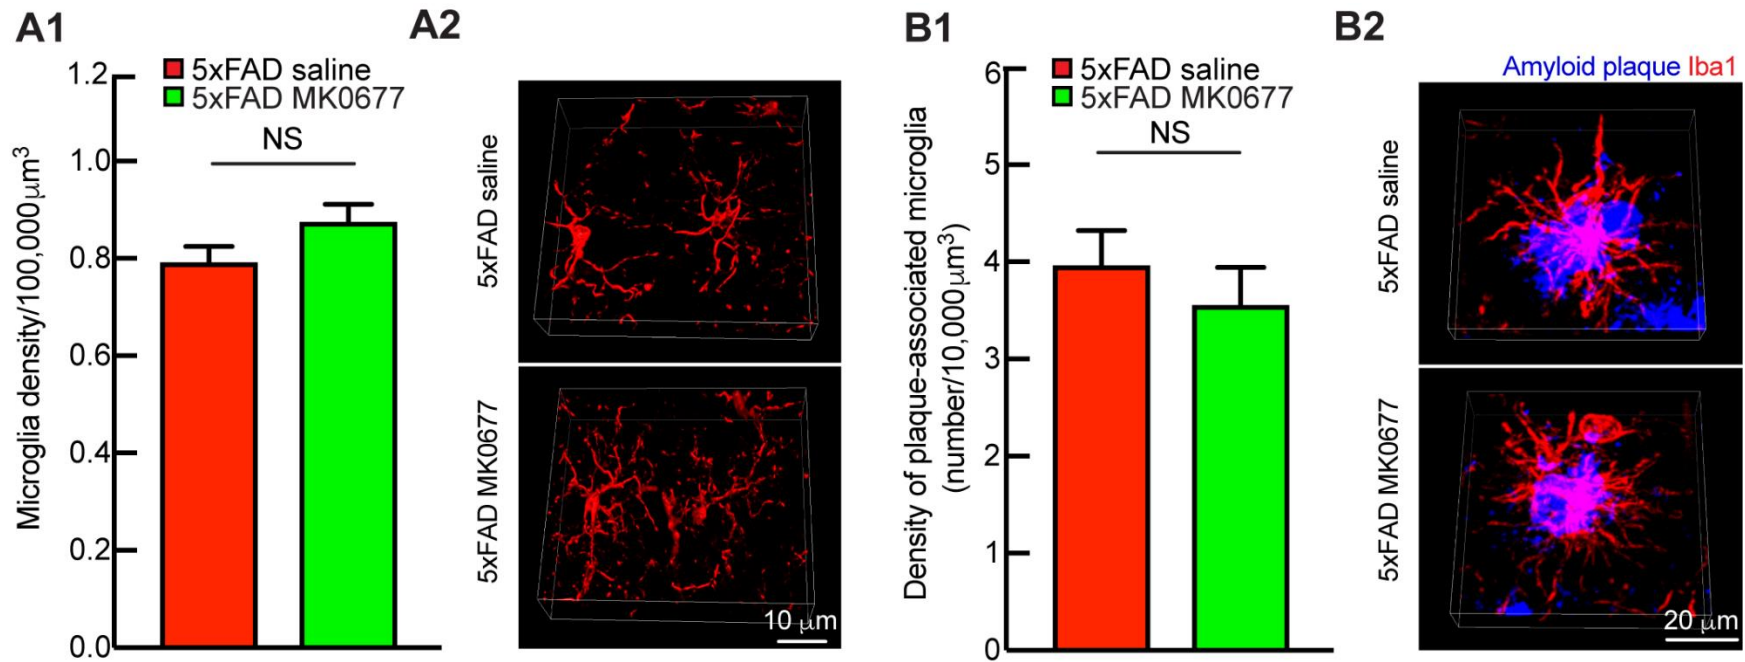

Supplement: NIHMS1571717-supplement-1.pdf [file NIHMS1571717-supplement-1.pdf]
